# Supplementary material
Source: publisher figshare collection journal article supplement (https://tandf.figshare.com/articles/dataset/_/7680287)

A

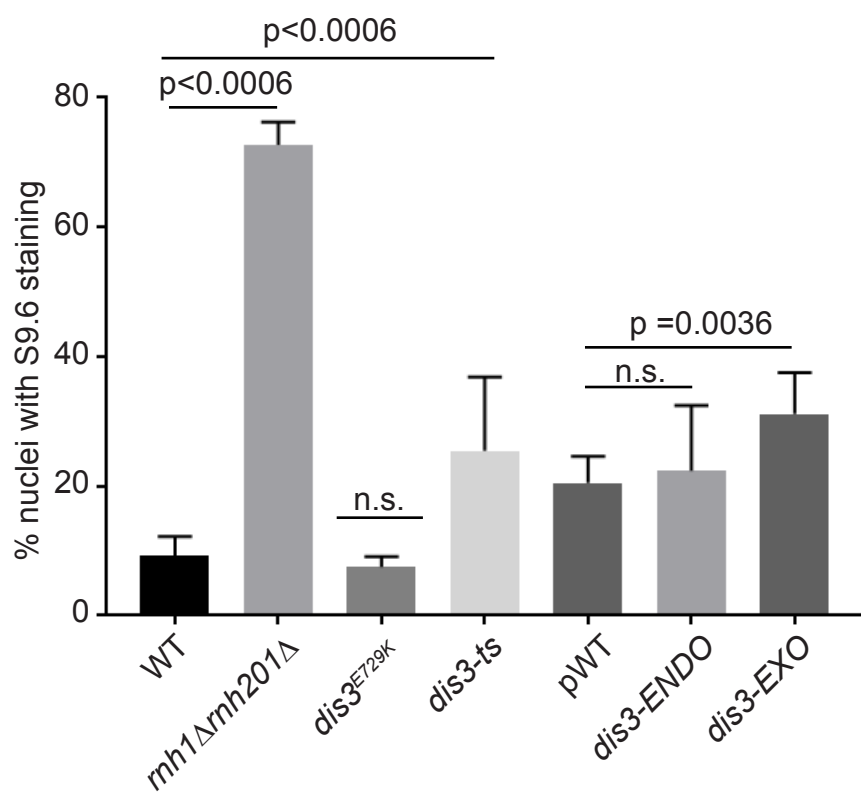

Figure-S2 (Milbury)

Supplement: Supplementary file 1 [file 3]

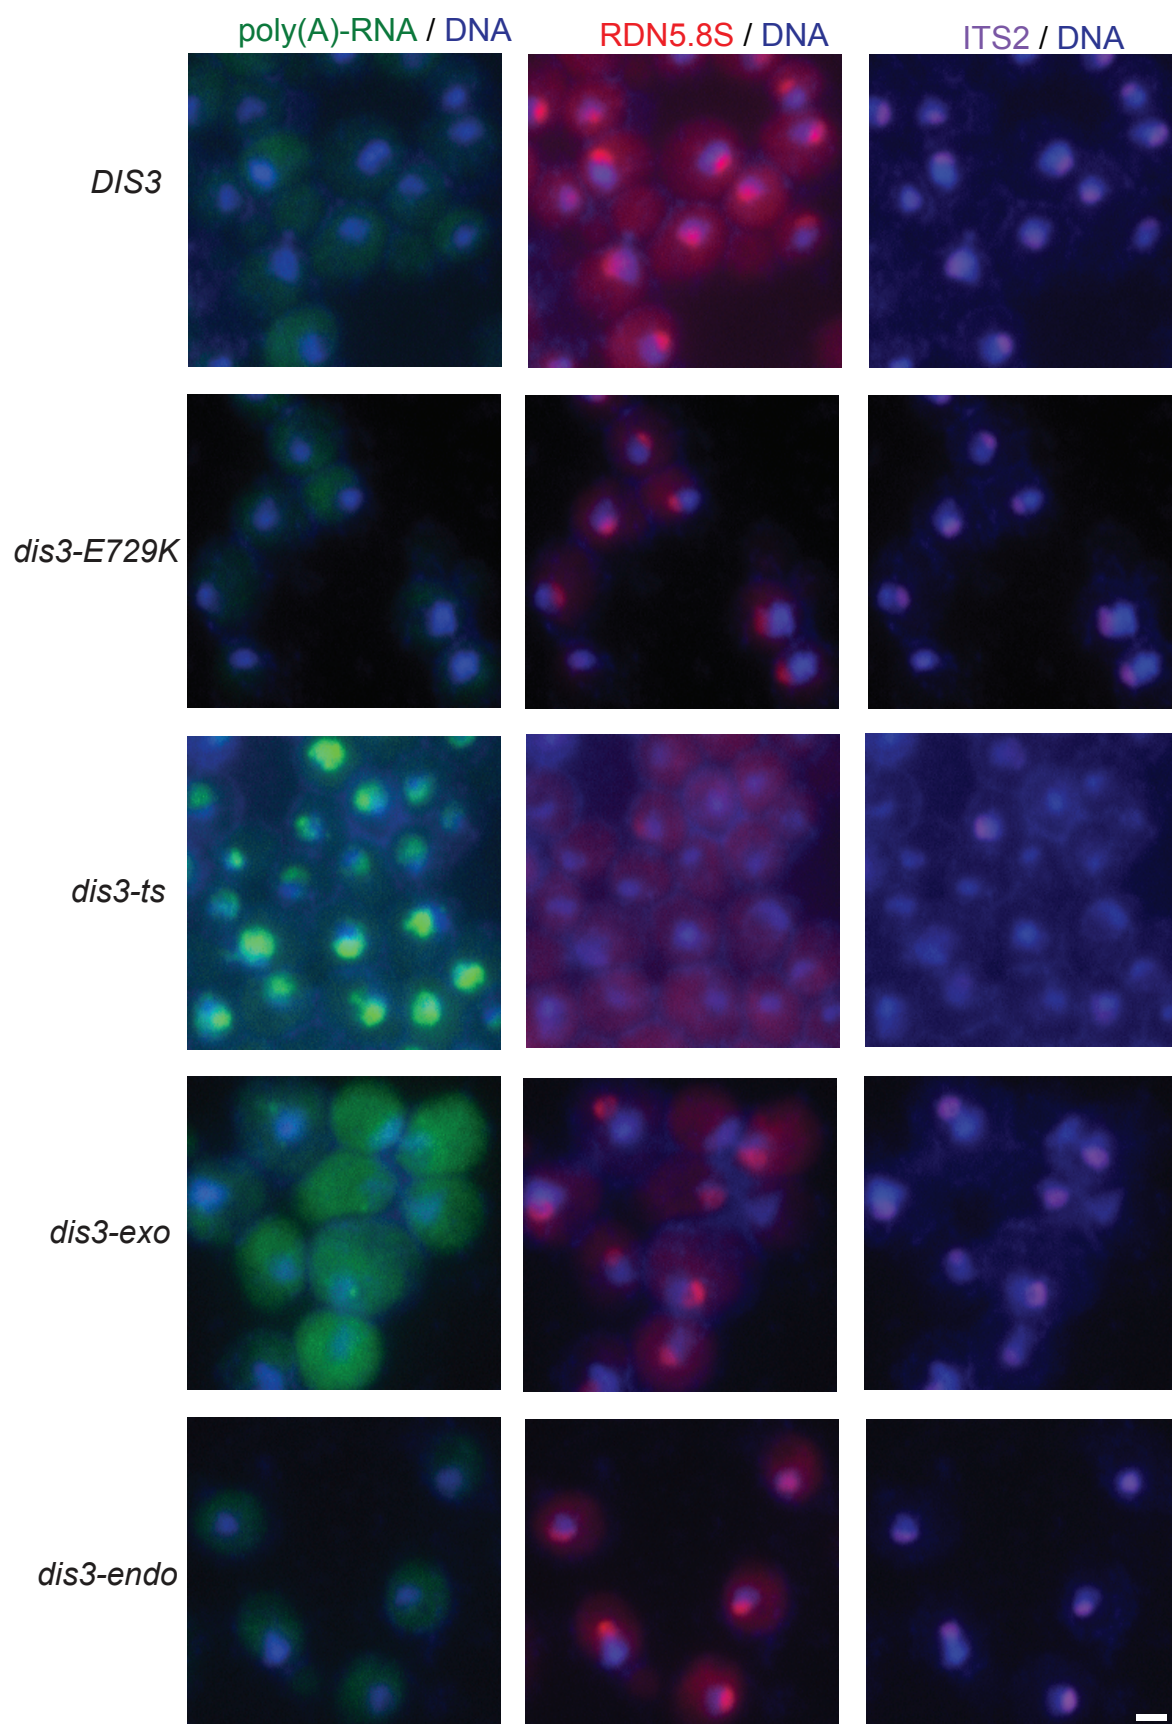

Figure-S1 (Milbury)

Supplement: Supplementary file 2 [file 3]
